# Supplementary material for: Unraveling the Difference in the Composition/Content of the Aroma Compounds in Different Tobacco Leaves: For Better Use
Source: Hindawi journal article supplement (doi:10.1155/2022/3293899), 2022-12-29
Supplement: f1 [file 3293899.f1.docx]

**Supporting Information**

**Unraveling the difference in composition/content of the aroma compounds in different tobacco leaves: for better use**

Tiejun Yan1, Ping Zhou1, Fei Long1, Jing Liu3, Fengguang Wu1, Maolin Zhang*,2, Jialei Liu*,2

1. China Tobacco Hubei Industrial Limited Liability Corporation, Wuhan, Hubei, China;
2. Institute of Environment and Sustainable Development in Agriculture, Chinese Academy of Agricultural Sciences, Beijing 100081, China.
3. Zunyi tobacco company, Zunyi, China

*E-mail: zhangmaolin@caas.cn, [liujialei@mail.ipc.ac.cn](mailto:liujialei@mail.ipc.ac.cn)

**Table S1** The peak position and area of identified compounds in the fingerprint spectrum of tobacco samples from eight producing areas.

| **Compound** | **RIP** | **Rt**  **[sec]** | **Dt [RIPrel]** | **YN-QJML-C3F** | **YN-QJML-C3F** | **YN-CHX-C3F** | **YN-CHX-C3F** | **YN-ZHT-C3F** | **YN-ZHT-C3F** | **SCH-LSHHD-C3F** | **SCH-LSHHD-C3F** | **SCH-GY-C3F** | **SCH-GY-C3F** | **SCH-LSHHL-C3F** | **SCH-LSHHL-C3F** | **GZH-QXXN-C3F** | **GZH-QXXN-C3F** | **GZH-ZY-C3F** | **GZH-ZY-C3F** |
| --- | --- | --- | --- | --- | --- | --- | --- | --- | --- | --- | --- | --- | --- | --- | --- | --- | --- | --- | --- |
| 1-hexanol | 884.00 | 372.65 | 1.32 | 78.95 | 75.63 | 102.79 | 96.43 | 59.10 | 70.30 | 72.53 | 68.94 | 40.63 | 35.60 | 29.96 | 30.34 | 63.72 | 66.43 | 97.97 | 103.41 |
| 1-Hydroxy-2-propanone | 675.40 | 177.25 | 1.23 | 244.47 | 243.62 | 256.63 | 261.33 | 277.56 | 296.78 | 169.97 | 163.28 | 185.39 | 193.94 | 265.00 | 269.15 | 254.12 | 274.05 | 212.90 | 212.65 |
| 1-pentanol dimer | 763.60 | 242.97 | 1.51 | 181.47 | 183.87 | 172.32 | 174.50 | 210.51 | 197.97 | 155.40 | 160.39 | 80.64 | 77.50 | 55.76 | 62.76 | 140.27 | 143.15 | 197.33 | 176.60 |
| 1-pentanol monomer | 763.80 | 243.17 | 1.25 | 174.20 | 172.55 | 177.57 | 174.98 | 187.22 | 194.88 | 165.50 | 162.53 | 123.44 | 125.64 | 93.00 | 98.81 | 146.31 | 146.13 | 206.90 | 208.46 |
| 2, 3-Butandione | 567.10 | 134.94 | 1.18 | 244.68 | 240.59 | 269.65 | 280.86 | 209.71 | 254.23 | 350.02 | 372.89 | 279.96 | 300.32 | 263.15 | 281.80 | 275.56 | 277.62 | 372.84 | 441.01 |
| 2, 3-Butanediol | 832.80 | 310.05 | 1.37 | 418.85 | 420.96 | 764.86 | 750.97 | 800.16 | 847.18 | 476.88 | 477.02 | 653.01 | 737.62 | 706.22 | 814.30 | 664.55 | 685.23 | 466.14 | 486.77 |
| 2-acetylfuran | 911.40 | 414.96 | 1.12 | 122.45 | 121.78 | 101.91 | 98.96 | 107.90 | 117.96 | 126.56 | 126.27 | 65.62 | 64.51 | 98.57 | 90.61 | 96.26 | 98.24 | 108.15 | 108.97 |
| 2-Acetylpyridine | 1011.10 | 604.31 | 1.12 | 129.26 | 121.84 | 123.05 | 132.42 | 146.16 | 154.91 | 181.34 | 180.20 | 116.07 | 152.53 | 185.09 | 126.73 | 121.56 | 114.17 | 158.19 | 167.16 |
| 2-Acetylpyrrole | 1073.70 | 722.67 | 1.11 | 220.55 | 213.28 | 227.73 | 250.17 | 229.70 | 232.82 | 129.14 | 118.31 | 115.10 | 123.52 | 155.25 | 165.90 | 232.11 | 228.06 | 195.29 | 200.06 |
| 2-Butanone | 591.60 | 143.33 | 1.25 | 1423.11 | 1433.55 | 1069.79 | 1102.71 | 1141.36 | 1065.53 | 989.96 | 1004.84 | 893.20 | 900.82 | 658.89 | 656.63 | 1003.60 | 946.76 | 1194.61 | 1210.22 |
| 2-Ethyl-1-hexanol | 1042.90 | 665.14 | 1.41 | 447.92 | 446.59 | 540.21 | 572.37 | 520.11 | 497.37 | 386.20 | 378.72 | 432.59 | 403.61 | 502.22 | 498.17 | 552.02 | 542.92 | 441.78 | 465.91 |
| 2-Ethylfuran | 688.90 | 184.86 | 1.31 | 1555.17 | 1589.16 | 1823.65 | 1833.97 | 1494.94 | 1523.17 | 2086.87 | 2110.53 | 1713.14 | 1628.44 | 1173.93 | 1187.85 | 1339.81 | 1354.42 | 1904.85 | 1896.17 |
| 2-Heptanol | 912.60 | 416.91 | 1.37 | 524.42 | 528.40 | 545.38 | 537.92 | 526.31 | 533.00 | 562.08 | 559.12 | 436.65 | 427.64 | 419.54 | 431.48 | 373.76 | 373.31 | 518.95 | 527.18 |
| 2-hexenol dimer | 852.70 | 332.28 | 1.52 | 548.46 | 562.24 | 416.58 | 417.14 | 515.82 | 560.95 | 1497.48 | 1526.70 | 314.60 | 291.03 | 295.36 | 317.18 | 358.93 | 381.01 | 560.68 | 558.57 |
| 2-hexenol monomer | 854.10 | 334.03 | 1.18 | 160.08 | 162.98 | 162.00 | 166.44 | 204.01 | 184.39 | 238.00 | 238.34 | 147.27 | 160.45 | 128.80 | 141.71 | 169.92 | 165.27 | 205.80 | 199.03 |
| 2-methyl-1-propanol | 655.90 | 167.70 | 1.17 | 151.73 | 152.27 | 141.90 | 140.04 | 161.97 | 160.45 | 135.51 | 136.38 | 165.58 | 155.89 | 161.28 | 168.03 | 156.29 | 165.04 | 136.56 | 139.53 |
| 2-methylbutanoic acid | 852.30 | 331.89 | 1.21 | 413.76 | 409.91 | 402.72 | 402.38 | 307.58 | 296.48 | 350.01 | 344.10 | 275.79 | 270.65 | 298.61 | 315.21 | 295.58 | 302.21 | 293.96 | 311.45 |
| 2-methylbutanol dimer | 734.20 | 217.42 | 1.49 | 669.86 | 660.40 | 646.34 | 658.62 | 642.91 | 592.15 | 611.44 | 599.44 | 288.63 | 289.78 | 269.03 | 270.55 | 619.44 | 612.88 | 612.44 | 611.23 |
| 2-methylbutanol monomer | 734.40 | 217.62 | 1.24 | 175.49 | 174.35 | 171.00 | 174.68 | 197.58 | 192.82 | 184.83 | 184.36 | 163.56 | 177.65 | 168.46 | 164.02 | 172.84 | 182.89 | 183.78 | 190.52 |
| 2-methyl-propanal dimer | 554.00 | 130.46 | 1.28 | 525.91 | 553.61 | 636.64 | 652.79 | 378.99 | 373.41 | 342.73 | 369.51 | 543.94 | 529.84 | 674.33 | 684.64 | 562.28 | 540.51 | 421.95 | 511.56 |
| 2-methyl-propanal monomer | 555.70 | 131.04 | 1.11 | 262.29 | 264.97 | 346.09 | 336.45 | 256.14 | 300.55 | 234.11 | 237.37 | 331.20 | 336.68 | 357.12 | 371.45 | 294.27 | 312.38 | 248.93 | 276.31 |
| 2-Octanol | 985.60 | 554.39 | 1.44 | 157.22 | 156.01 | 156.50 | 153.53 | 150.61 | 152.77 | 166.14 | 165.21 | 182.84 | 200.13 | 100.81 | 96.68 | 162.46 | 154.56 | 203.14 | 199.52 |
| 2-pentanone | 661.80 | 170.43 | 1.37 | 245.84 | 242.10 | 224.86 | 223.77 | 198.44 | 191.45 | 207.65 | 203.60 | 204.78 | 197.22 | 143.15 | 141.00 | 143.96 | 126.87 | 221.70 | 242.92 |
| 2-Pentylfuran | 996.40 | 575.83 | 1.26 | 375.65 | 373.31 | 410.79 | 408.53 | 412.83 | 410.42 | 350.45 | 349.26 | 263.58 | 257.59 | 215.66 | 213.69 | 323.75 | 304.99 | 390.59 | 377.59 |
| 2-Phenylethanol | 1113.10 | 795.80 | 1.29 | 238.21 | 236.91 | 295.55 | 337.11 | 314.43 | 320.33 | 190.60 | 183.67 | 136.15 | 147.70 | 193.13 | 186.36 | 268.30 | 271.87 | 315.22 | 302.93 |
| 3-methylbutanal | 657.20 | 168.28 | 1.41 | 771.86 | 805.81 | 728.50 | 770.32 | 623.31 | 619.79 | 719.43 | 755.05 | 687.99 | 674.50 | 590.59 | 592.00 | 578.41 | 548.96 | 780.53 | 791.73 |
| 3-Methylvaleric acid dimer | 956.90 | 498.03 | 1.63 | 277.70 | 281.22 | 275.10 | 263.20 | 304.68 | 312.55 | 310.77 | 309.79 | 176.42 | 162.24 | 91.77 | 91.27 | 146.22 | 137.32 | 333.91 | 320.40 |
| 3-Methylvaleric acid monomer | 957.10 | 498.42 | 1.29 | 68.07 | 67.22 | 63.94 | 58.38 | 65.65 | 74.05 | 61.99 | 57.33 | 78.17 | 80.90 | 81.71 | 87.30 | 80.72 | 70.64 | 68.48 | 67.04 |
| 5-methylfurfuryl alcohol | 956.90 | 498.03 | 1.57 | 136.10 | 134.42 | 121.67 | 136.99 | 127.25 | 121.47 | 228.96 | 228.27 | 79.09 | 88.34 | 74.31 | 71.71 | 138.43 | 131.70 | 180.38 | 178.33 |
| 6-Methyl-5-hepten-2-one | 992.40 | 567.84 | 1.18 | 9259.93 | 9403.42 | 7379.10 | 7460.95 | 6635.78 | 6645.19 | 8817.38 | 8858.51 | 6384.35 | 6367.05 | 4479.63 | 4668.62 | 7472.07 | 7772.72 | 9546.50 | 9771.18 |
| Acetoin | 716.10 | 203.19 | 1.33 | 3539.76 | 3604.39 | 3615.23 | 3590.03 | 3665.15 | 4083.88 | 3620.78 | 3675.43 | 3821.90 | 3758.04 | 3373.13 | 3413.60 | 2874.36 | 2985.00 | 3518.30 | 3531.38 |
| Acetone | 512.40 | 116.22 | 1.12 | 4751.22 | 4837.29 | 4608.93 | 4620.57 | 4382.35 | 4261.59 | 4638.77 | 4758.34 | 4117.14 | 4142.78 | 3698.10 | 3700.44 | 4157.73 | 4160.20 | 4770.96 | 4862.43 |
| alpha-Methylbenzenemethanol | 1057.80 | 693.03 | 1.19 | 230.62 | 225.48 | 161.71 | 167.29 | 129.26 | 113.82 | 300.33 | 299.50 | 95.87 | 96.85 | 88.58 | 78.87 | 213.04 | 210.55 | 361.94 | 407.78 |
| alpha-Terpieol | 1199.80 | 956.28 | 1.29 | 449.44 | 446.82 | 479.20 | 496.82 | 386.36 | 375.39 | 322.19 | 320.47 | 296.22 | 290.51 | 302.63 | 321.57 | 320.21 | 326.02 | 434.28 | 441.00 |
| Benzaldehyde dimer | 957.70 | 499.59 | 1.47 | 765.85 | 769.24 | 737.64 | 716.45 | 762.37 | 774.35 | 650.86 | 652.64 | 489.22 | 480.31 | 364.10 | 351.86 | 633.39 | 613.00 | 819.15 | 813.79 |
| Benzaldehyde monomer | 957.70 | 499.59 | 1.15 | 703.30 | 695.42 | 622.32 | 614.95 | 704.35 | 680.39 | 504.84 | 501.89 | 584.89 | 570.25 | 482.42 | 491.18 | 571.57 | 562.53 | 652.72 | 647.04 |
| Benzenemethanol | 1041.30 | 662.02 | 1.33 | 253.62 | 252.16 | 225.11 | 234.99 | 227.16 | 236.88 | 169.59 | 168.41 | 178.38 | 151.75 | 169.50 | 187.37 | 236.67 | 220.11 | 230.16 | 235.49 |
| Cyclohexanone | 852.70 | 332.28 | 1.45 | 239.92 | 239.45 | 256.00 | 282.99 | 330.70 | 307.09 | 248.52 | 242.56 | 210.71 | 208.84 | 244.11 | 248.78 | 311.56 | 317.75 | 234.78 | 230.80 |
| Dimethyl disulphide | 757.90 | 237.90 | 1.15 | 740.24 | 749.42 | 714.09 | 713.83 | 673.39 | 678.26 | 652.62 | 659.14 | 526.19 | 527.39 | 826.06 | 849.62 | 690.92 | 691.63 | 555.17 | 560.28 |
| E-2-hexen-1-ol | 845.90 | 324.48 | 1.17 | 469.78 | 478.31 | 577.49 | 582.15 | 429.92 | 423.88 | 455.42 | 461.50 | 462.34 | 442.57 | 316.34 | 336.08 | 375.26 | 366.76 | 534.17 | 546.82 |
| (E, Z)-2, 6-Nonadienal | 1155.20 | 873.80 | 1.37 | 136.36 | 133.97 | 92.13 | 81.37 | 166.03 | 200.77 | 192.90 | 184.30 | 75.86 | 72.40 | 84.30 | 83.48 | 134.16 | 136.56 | 74.35 | 70.37 |
| Ethyl-2-methylbutanoate | 820.10 | 296.79 | 1.24 | 883.41 | 886.55 | 111.76 | 114.76 | 127.27 | 125.81 | 114.77 | 117.30 | 115.94 | 63.60 | 778.76 | 325.96 | 401.06 | 276.57 | 128.58 | 137.05 |
| ethyl acetate | 608.00 | 148.98 | 1.34 | 191.63 | 199.22 | 115.95 | 117.75 | 280.64 | 256.27 | 221.35 | 231.47 | 45.25 | 41.74 | 51.09 | 56.17 | 166.80 | 159.68 | 145.08 | 129.08 |
| ethyl butyrate | 821.10 | 297.76 | 1.56 | 31.96 | 29.91 | 69.23 | 68.17 | 54.70 | 46.50 | 177.26 | 184.19 | 39.06 | 41.41 | 11.45 | 9.05 | 20.40 | 20.07 | 113.93 | 85.89 |
| Ethyl pentanoate | 897.10 | 392.15 | 1.68 | 34.68 | 34.38 | 31.00 | 29.85 | 34.26 | 25.21 | 36.66 | 35.07 | 15.68 | 13.56 | 8.62 | 9.88 | 20.45 | 22.11 | 51.86 | 46.12 |
| ethyl propanoate | 704.60 | 195.00 | 1.15 | 394.50 | 408.09 | 436.68 | 437.94 | 493.73 | 511.78 | 258.89 | 267.71 | 336.43 | 350.52 | 594.32 | 584.21 | 407.01 | 405.59 | 261.77 | 245.83 |
| Furfural dimer | 829.40 | 306.35 | 1.33 | 928.88 | 926.27 | 1125.43 | 1114.70 | 952.92 | 926.96 | 1217.35 | 1205.74 | 637.00 | 594.15 | 498.89 | 492.78 | 716.59 | 700.68 | 1003.90 | 1006.35 |
| Furfural monomer | 831.00 | 308.10 | 1.08 | 395.42 | 384.50 | 418.56 | 416.53 | 418.82 | 409.90 | 459.93 | 443.93 | 386.46 | 414.02 | 260.80 | 257.86 | 288.81 | 287.90 | 445.73 | 445.36 |
| gamma-Butyrolactone dimer | 917.30 | 425.10 | 1.30 | 3999.03 | 4030.62 | 4474.58 | 4486.67 | 3631.58 | 4145.88 | 4630.23 | 4669.52 | 3845.20 | 3845.76 | 4604.08 | 4649.28 | 3547.67 | 3525.42 | 3767.27 | 3595.56 |
| gamma-butyrolactone monomer | 920.30 | 430.17 | 1.08 | 1454.95 | 1442.94 | 1435.70 | 1431.56 | 1482.54 | 1490.80 | 1415.25 | 1384.51 | 1606.38 | 1715.19 | 1352.53 | 1334.91 | 1108.10 | 1114.53 | 1394.16 | 1403.17 |
| Heptanal dimer | 901.80 | 399.36 | 1.70 | 40.39 | 39.94 | 34.65 | 34.46 | 29.57 | 32.02 | 42.05 | 39.46 | 28.72 | 27.05 | 21.09 | 22.29 | 30.72 | 29.52 | 33.52 | 33.56 |
| Heptanal monomer | 901.90 | 399.56 | 1.33 | 138.03 | 133.94 | 160.74 | 168.05 | 159.99 | 162.90 | 158.25 | 157.51 | 153.38 | 153.66 | 114.86 | 119.83 | 139.29 | 138.10 | 152.54 | 155.27 |
| hexanal dimer | 794.00 | 271.25 | 1.56 | 320.18 | 335.56 | 157.44 | 144.70 | 84.54 | 82.00 | 421.24 | 438.55 | 286.91 | 258.80 | 70.92 | 72.94 | 78.56 | 82.02 | 226.39 | 262.46 |
| hexanal monomer | 794.00 | 271.25 | 1.25 | 272.42 | 272.46 | 195.22 | 185.71 | 154.31 | 173.08 | 275.96 | 274.16 | 256.46 | 239.76 | 133.42 | 135.59 | 145.27 | 146.02 | 235.16 | 251.66 |
| isoamyl acetate dimer | 879.10 | 365.82 | 1.75 | 1413.25 | 1431.72 | 994.96 | 1026.97 | 612.43 | 593.16 | 830.77 | 841.96 | 112.81 | 101.64 | 35.88 | 39.69 | 318.85 | 299.81 | 1053.16 | 953.02 |
| Isoamyl acetate monomer | 879.20 | 366.01 | 1.31 | 428.13 | 421.22 | 346.78 | 345.77 | 322.49 | 295.97 | 309.34 | 302.87 | 134.67 | 116.73 | 109.94 | 83.75 | 214.00 | 202.46 | 333.36 | 333.67 |
| Isopentanol | 758.80 | 238.68 | 1.12 | 96.94 | 96.08 | 84.58 | 84.88 | 92.91 | 99.26 | 97.52 | 96.90 | 51.73 | 48.13 | 30.86 | 35.62 | 72.62 | 72.48 | 116.00 | 110.21 |
| Linalool | 1102.50 | 776.10 | 1.22 | 761.62 | 750.56 | 901.89 | 926.32 | 707.49 | 738.79 | 711.05 | 700.72 | 460.00 | 427.60 | 564.53 | 529.53 | 642.68 | 606.61 | 813.14 | 828.29 |
| Methional | 883.00 | 371.28 | 1.09 | 178.30 | 178.93 | 188.90 | 179.61 | 138.51 | 149.05 | 151.67 | 151.99 | 99.23 | 98.86 | 119.66 | 114.97 | 136.46 | 139.91 | 158.03 | 164.43 |
| methyl ester acetic acid | 539.70 | 125.58 | 1.19 | 5996.37 | 6004.76 | 5522.92 | 5554.88 | 6319.05 | 6073.36 | 6263.42 | 6238.88 | 4623.15 | 4596.68 | 4050.67 | 4055.11 | 5282.87 | 5239.58 | 5868.29 | 5446.13 |
| Methyl-5-furfural | 963.70 | 511.29 | 1.13 | 393.45 | 389.42 | 440.45 | 449.43 | 386.31 | 420.49 | 361.03 | 353.15 | 263.30 | 286.15 | 306.24 | 306.70 | 302.98 | 296.22 | 392.50 | 396.58 |
| n-Nonanal dimer | 1104.00 | 778.83 | 1.94 | 44.94 | 42.88 | 60.43 | 52.30 | 37.50 | 76.01 | 67.22 | 59.07 | 41.48 | 41.58 | 47.23 | 46.32 | 86.05 | 88.61 | 53.11 | 58.38 |
| n-Nonanal monomer | 1104.60 | 780.00 | 1.48 | 377.64 | 382.81 | 419.14 | 388.68 | 346.17 | 462.92 | 350.83 | 350.55 | 295.66 | 334.64 | 326.78 | 315.07 | 489.92 | 492.04 | 384.45 | 448.91 |
| Octanal | 1009.40 | 601.19 | 1.41 | 163.03 | 161.46 | 157.94 | 156.36 | 154.94 | 181.64 | 152.95 | 151.27 | 119.73 | 140.22 | 118.32 | 122.30 | 130.12 | 144.83 | 149.17 | 163.59 |
| Pentanal dimer | 698.60 | 190.91 | 1.42 | 1277.00 | 1267.14 | 1027.41 | 1063.60 | 649.45 | 567.76 | 1427.38 | 1401.55 | 653.53 | 657.99 | 468.97 | 527.05 | 1290.00 | 1353.68 | 1563.91 | 1579.77 |
| pentanal monomer | 700.60 | 192.27 | 1.18 | 204.47 | 208.86 | 209.98 | 206.61 | 192.83 | 188.89 | 188.74 | 191.93 | 206.05 | 206.32 | 130.59 | 136.89 | 162.26 | 165.93 | 198.42 | 196.98 |
| pentanoic acid | 905.10 | 404.63 | 1.23 | 566.35 | 566.20 | 712.07 | 739.91 | 707.86 | 695.30 | 591.07 | 586.85 | 570.96 | 573.96 | 708.34 | 700.76 | 792.49 | 787.91 | 589.39 | 618.86 |
| phenylacetaldehyde dimer | 1045.50 | 670.02 | 1.54 | 187.43 | 180.00 | 192.80 | 181.22 | 142.40 | 148.24 | 170.12 | 169.08 | 122.79 | 122.44 | 151.88 | 145.27 | 169.32 | 171.03 | 183.08 | 186.58 |
| phenylacetaldehyde monomer | 1045.90 | 670.80 | 1.25 | 473.73 | 465.31 | 485.13 | 469.37 | 347.17 | 344.62 | 358.04 | 357.83 | 367.89 | 410.33 | 436.64 | 413.24 | 413.14 | 426.52 | 390.71 | 395.96 |
| phenylacetic acid | 1227.80 | 1008.15 | 1.34 | 1260.83 | 1254.66 | 1299.11 | 1311.47 | 1435.56 | 1428.46 | 1164.72 | 1160.94 | 916.79 | 947.43 | 822.30 | 790.56 | 1240.37 | 1182.81 | 1577.30 | 1612.59 |
| Propanal | 494.10 | 109.98 | 1.04 | 706.18 | 723.40 | 524.32 | 526.90 | 1028.20 | 831.60 | 763.58 | 767.92 | 615.75 | 587.69 | 499.30 | 484.98 | 720.85 | 649.23 | 638.87 | 598.82 |
| propanoic acid | 752.40 | 233.03 | 1.10 | 138.76 | 136.98 | 150.58 | 151.56 | 146.78 | 140.23 | 204.69 | 201.19 | 134.38 | 139.57 | 125.30 | 116.85 | 125.33 | 126.86 | 157.90 | 151.58 |
| Propylsulfide | 887.60 | 377.91 | 1.16 | 320.42 | 310.64 | 242.76 | 252.54 | 281.40 | 277.54 | 315.28 | 303.28 | 196.35 | 184.00 | 180.86 | 216.56 | 249.38 | 255.56 | 271.83 | 283.89 |
| toluene | 746.90 | 228.15 | 1.02 | 125.74 | 126.30 | 84.96 | 84.47 | 65.15 | 61.35 | 214.88 | 219.72 | 70.73 | 64.42 | 73.77 | 81.07 | 165.03 | 170.14 | 212.60 | 230.39 |
| Z-3-Hexen-1-ol | 860.20 | 341.25 | 1.51 | 381.14 | 379.29 | 312.55 | 292.00 | 351.53 | 358.41 | 520.56 | 517.09 | 101.00 | 97.65 | 84.70 | 90.82 | 179.17 | 179.94 | 369.74 | 367.98 |
